# Supplementary material for: G-quadruplex-based antiviral hydrogels by direct gelation of clinical drugs
Source: Royal Society of Chemistry journal article supplement (doi:10.1039/c9qm00209j), 2019-01-01
Supplement: c9qm00209j1.pdf [file c9qm00209j1.pdf]

## **Supplementary Information for:**

### **G-quadruplex based Antiviral Hydrogels by Direct Gelation of Clinical Drugs**

Jingjing Hu<sup>a</sup>, Hui Wang<sup>b</sup>, Qianyu Hu<sup>a</sup> and Yiyun Cheng<sup>a,b\*</sup>

<sup>a</sup>Shanghai Key Laboratory of Regulatory Biology, East China Normal University,  
Shanghai 200241, China

<sup>b</sup>South China Advanced Institute for Soft Matter Science and Technology, South China  
University of Technology, Guangzhou 510640, China

\*Correspondence may be addressed to [yycheng@mail.ustc.edu.cn](mailto:yycheng@mail.ustc.edu.cn)

#### **This supplement includes:**

Supplementary Figure 1 to 6 (Page S2-S7)

## Supplementary Figures

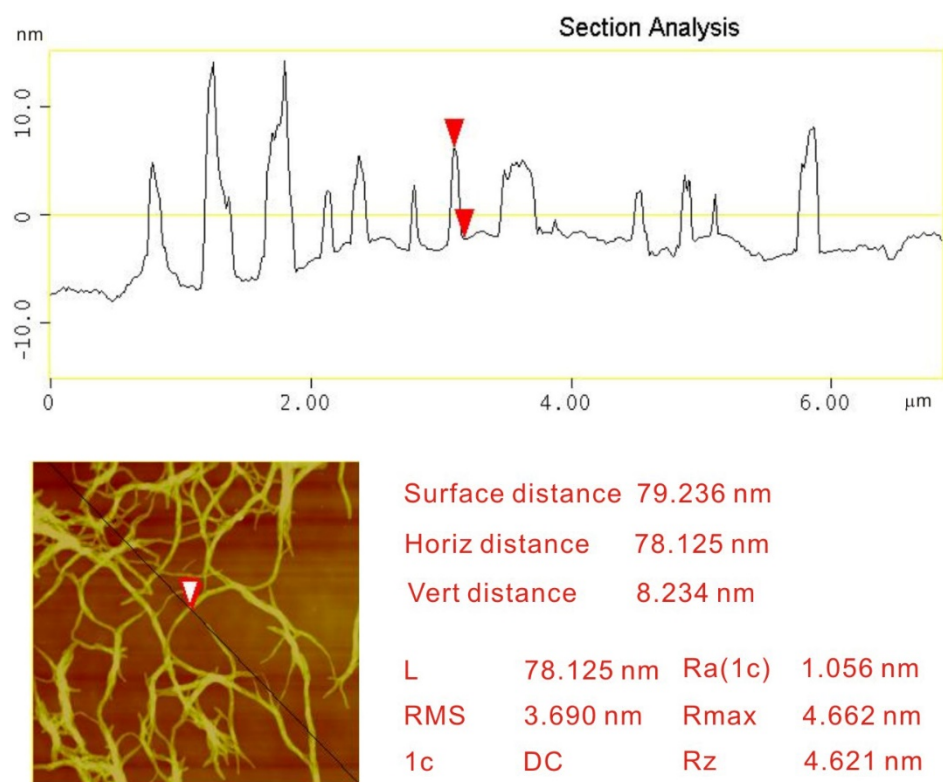

**Figure S1.** Section analysis of the entecavir fiber by AFM image.

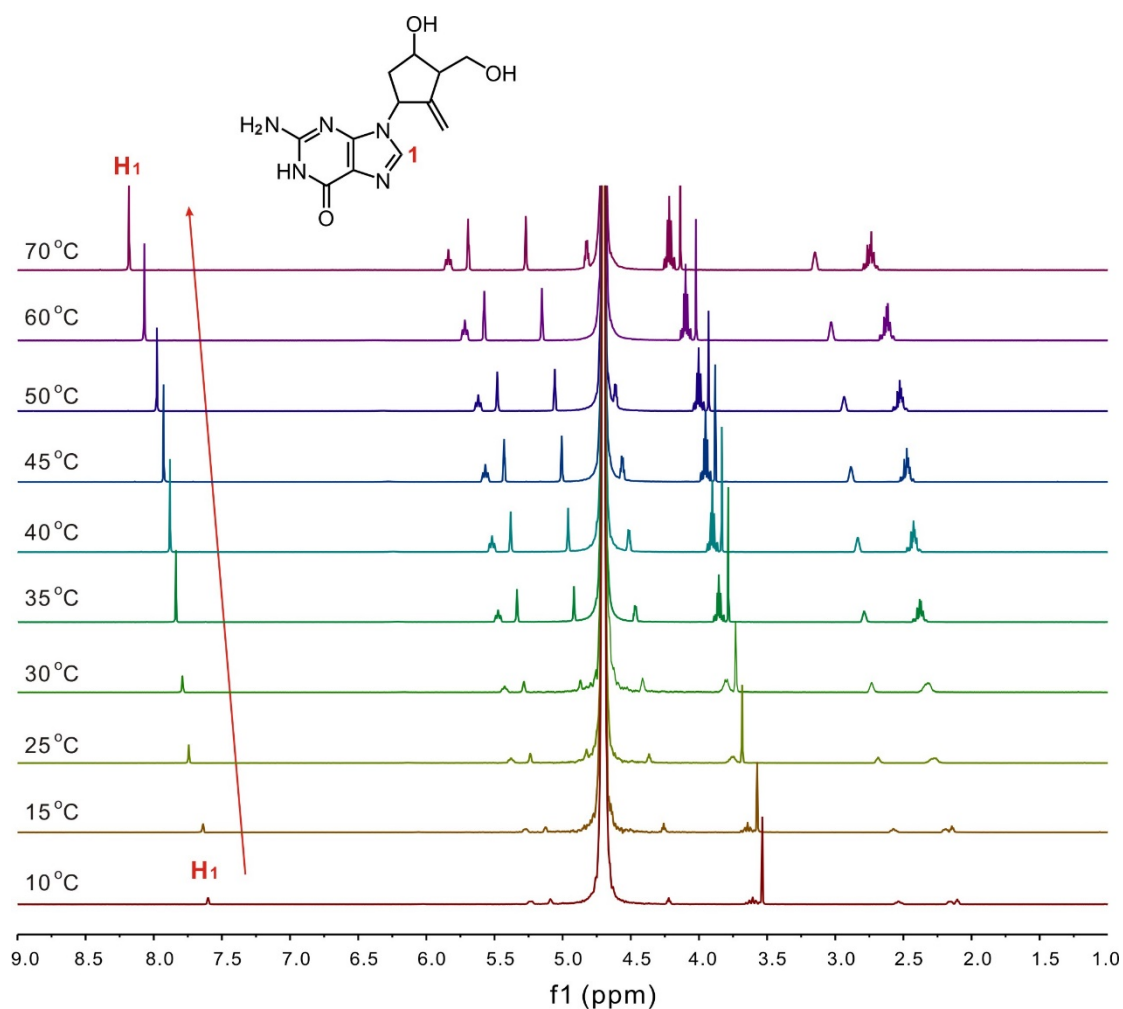

**Figure S2.**  $^1\text{H}$  NMR spectra of the entecavir gel (40 mM entecavir, 80 mM  $\text{K}^+$ ) performed at 10 °C, 15 °C, 25 °C, 30 °C, 35 °C, 45 °C, 50 °C, 60 °C, and 70 °C, respectively. The down-field shift of  $\text{H}_1$  was observed when increasing the temperature.

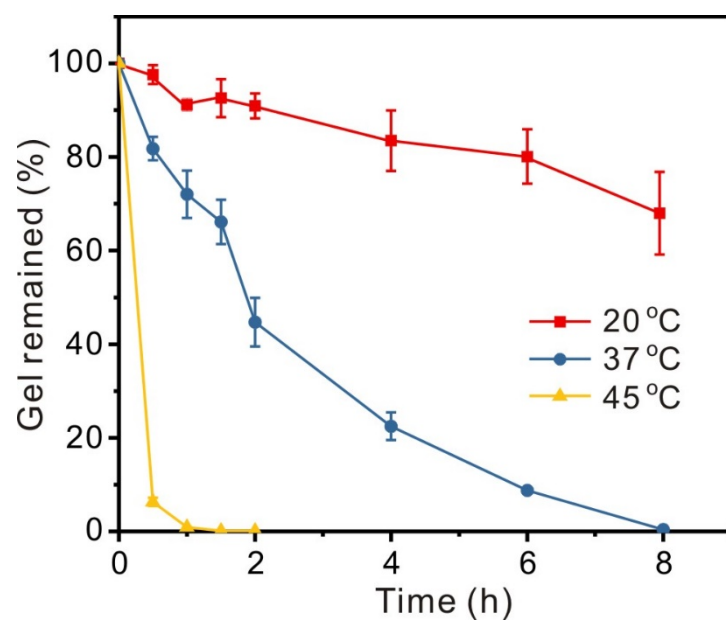

**Figure S3.** Gel degradation behaviors of the entecavir gel (40 mM entecavir, 80 mM  $K^+$ ) at 20 °C, 37 °C, and 45 °C, respectively.

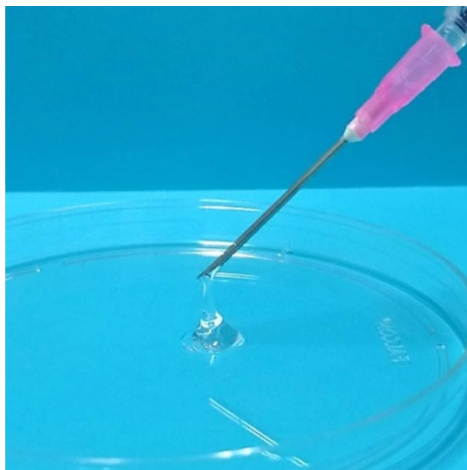

**Figure S4.** Injection image of entecavir hydrogel (40 mM entecavir, 80 mM K<sup>+</sup>) from a syringe (1.2×30 mm, the outer diameter is 1.2 mm and the length of the needle is 30 mm).

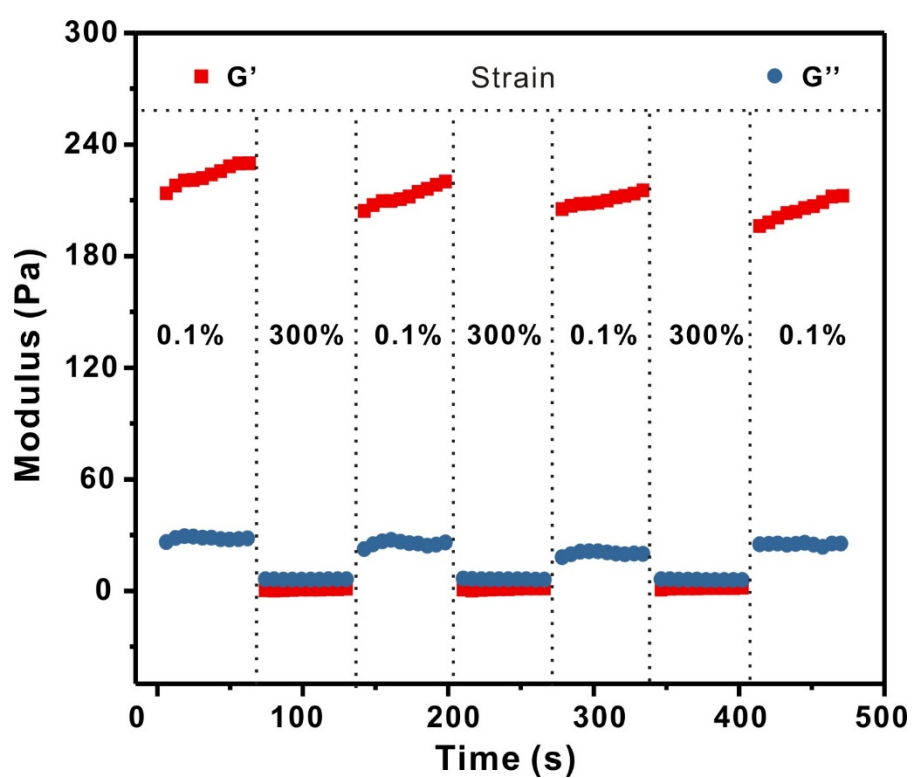

**Figure S5.** Thixotropic property of the entecavir gel (40 mM entecavir, 80 mM  $K^+$ ) determined by breaking and recovery of the gel using an alternative strain of 0.1% and 300%, and the process was repeated for three cycles.

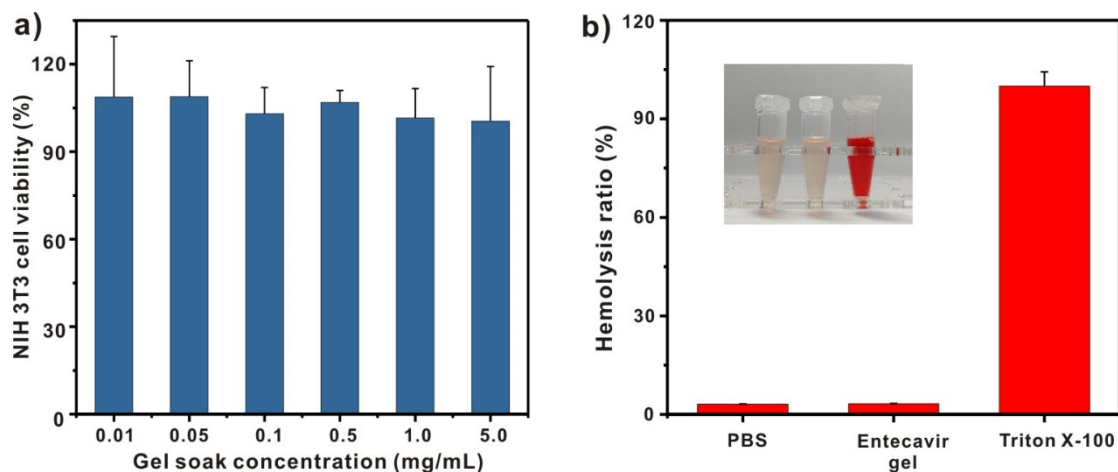

**Figure S6.** (a) Cytotoxicity of the entecavir gel extract on NIH 3T3 cells at different concentrations. (b) Hemolysis of the entecavir gel. PBS and Triton X-100 were tested as negative and positive controls, respectively. The insert is the photograph of the blood cell suspensions treated by PBS, hydrogel, and Triton X-100, respectively. The concentrations of entecavir and  $K^+$  in the hydrogels were 40 mM and 80 mM, respectively.
